# Supplementary material
Source: MDPI journal article supplement (https://www.mdpi.com/2624-795X/5/1/14)
Supplement: s1 [file s1]

Archive with 1 entries (1 files):
- geohazards-2876892-supplementary.pdf
